# Supplementary material for: Utility of Geostationary Lightning Mapper-derived lightning NO emission estimates in air quality modeling studies
Source: Copernicus journal article supplement (doi:10.5194/acp-24-41-2024), 2024-01-04
Supplement: Supplementary file 1 [file acp-24-41-2024-supplement.pdf]

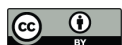

*Supplement of*

## **Utility of Geostationary Lightning Mapper-derived lightning NO emission estimates in air quality modeling studies**

**Peiyang Cheng et al.**

*Correspondence to:* Peiyang Cheng (peiyang.cheng@hotmail.com, peiyang.cheng@nsstc.uah.edu)

The copyright of individual parts of the supplement might differ from the article licence.

**Table S1: WRF physics, analysis nudging, and dynamics options used in Cheng et al. (2022). Bold texts indicate different dynamics options used in Cheng et al. (2022) as opposed to those of this study.**

|                   | Option                         | Setting                                                       |
|-------------------|--------------------------------|---------------------------------------------------------------|
| Physics           | Microphysics                   | Morrison 2-moment scheme (Morrison et al., 2009)              |
|                   | Cumulus                        | Multiscale Kain-Fritsch (Zheng et al., 2016)                  |
|                   | Radiation                      | RRTMG (Iacono et al., 2008)                                   |
|                   | Surface layer                  | Pleim (Pleim, 2006)                                           |
|                   | Land surface model (LSM)       | Pleim-Xiu (Xiu and Pleim, 2001; Pleim and Xiu, 2003)          |
|                   | Planetary boundary layer (PBL) | ACM2 (Pleim, 2007a,b)                                         |
| Analysis nudging  | Nudging height cutoff          | Above the PBL or the ~1.5-km model layer, whichever is higher |
|                   | $U, V$ nudging coefficient     | $3.0 \times 10^{-4} \text{ s}^{-1}$                           |
|                   | $T$ nudging coefficient        | $3.0 \times 10^{-4} \text{ s}^{-1}$                           |
|                   | $Q$ nudging coefficient        | $1.0 \times 10^{-5} \text{ s}^{-1}$                           |
| Dynamics          | Model dynamics                 | Non-hydrostatic                                               |
|                   | Time integration               | Runge-Kutta, third order                                      |
|                   | Vertical coordinate            | <b>Hybrid</b>                                                 |
|                   | Turbulence and mixing          | Without vertical correction                                   |
|                   | Eddy coefficient               | Horizontal Smagorinsky, first order                           |
|                   | Sixth order diffusion          | <b>No up-gradient</b>                                         |
|                   | Upper level damping            | <b>W-Rayleigh</b>                                             |
|                   | Vertical velocity damping      | <b>On (damping coefficient: 0.05)</b>                         |
| Advection options | <b>Monotonic</b>               |                                                               |

**Table S2: CMAQ science options used in Cheng et al. (2022). Bold texts indicate different dynamics options used in Cheng et al. (2022) as opposed to those of this study (some were due to recent upgrades to the CMAQ model).**

| Science Option                   | Setting                           |
|----------------------------------|-----------------------------------|
| Gas phase chemistry solver       | CB6r3 (Luecken et al., 2019)      |
| Aerosol chemistry module         | <b>AERO6 (Nolte et al., 2015)</b> |
| Dry deposition scheme            | M3Dry                             |
| In-line biogenic emission module | BEIS3                             |
| CTM_OCEAN_CHEM                   | Y                                 |
| CTM_WB_DUST                      | Y                                 |
| <b>CTM_ERODE_AGLAND</b>          | N                                 |
| CTM_WBDUST_BELD                  | BELD3                             |
| CTM_LTNG_NO                      | N                                 |
| <b>CTM_WVEL</b>                  | <b>Y</b>                          |
| KZMIN                            | Y                                 |
| <b>CTM_ILDEPV</b>                | <b>Y</b>                          |
| CTM_MOSAIC                       | N                                 |
| CTM_FST                          | N                                 |
| CTM_ABFLUX                       | N                                 |
| CTM_HGBIDI                       | N                                 |
| CTM_SFC_HONO                     | Y                                 |
| CTM_GRAV_SETL                    | Y                                 |
| CTM_BIOGEMIS                     | Y                                 |
| <b>CTM_PT3DEMIS</b>              | N                                 |
| <b>CTM_ZERO_PCSEA</b>            | N                                 |

**Table S3: Ground-level MDA8 ozone statistics over the model domain and geographic regions for June 2019. Bold numbers indicate better performance for each case. See Fig. 4 for the interpretation of geographical regions.**

| Region | Case  | Record | OBS [ppbv] | MOD [ppbv] | MB [ppbv]  | NMB [%]    | cRMSE [ppbv] | NME [%]     | R           |
|--------|-------|--------|------------|------------|------------|------------|--------------|-------------|-------------|
| Domain | CNTRL | 34128  | 46.1       | 47.5       | <b>1.4</b> | <b>3.0</b> | 8.4          | <b>14.2</b> | 0.72        |
|        | LGTNO | 34128  | 46.1       | 47.8       | 1.7        | 3.7        | <b>8.3</b>   | <b>14.2</b> | <b>0.73</b> |
| NE     | CNTRL | 5358   | 43.9       | 47.8       | <b>3.9</b> | <b>8.9</b> | <b>7.3</b>   | <b>14.8</b> | 0.72        |
|        | LGTNO | 5358   | 43.9       | 48.1       | <b>4.2</b> | <b>9.5</b> | <b>7.3</b>   | <b>14.9</b> | <b>0.73</b> |
| SE     | CNTRL | 5871   | 41.4       | 44.2       | <b>2.8</b> | <b>6.8</b> | <b>7.6</b>   | <b>15.7</b> | <b>0.79</b> |
|        | LGTNO | 5871   | 41.4       | 44.7       | 3.3        | 8.0        | <b>7.6</b>   | 16.0        | <b>0.79</b> |
| UM     | CNTRL | 8370   | 46.1       | 45.7       | -0.4       | -0.8       | 7.5          | 12.8        | 0.65        |
|        | LGTNO | 8370   | 46.1       | 46.1       | <b>0.0</b> | <b>0.0</b> | <b>7.4</b>   | <b>12.6</b> | <b>0.66</b> |
| LM     | CNTRL | 3319   | 42.8       | 43.8       | <b>1.0</b> | <b>2.2</b> | 9.5          | 17.2        | <b>0.73</b> |
|        | LGTNO | 3319   | 42.8       | 44.2       | 1.4        | 3.3        | <b>9.4</b>   | <b>17.1</b> | <b>0.73</b> |
| RM     | CNTRL | 5868   | 53.1       | 54.5       | <b>1.4</b> | <b>2.6</b> | 8.5          | 11.9        | 0.49        |
|        | LGTNO | 5868   | 53.1       | 54.7       | 1.6        | 3.0        | <b>8.4</b>   | <b>11.8</b> | <b>0.50</b> |
| PC     | CNTRL | 5342   | 48.1       | 48.4       | <b>0.2</b> | <b>0.5</b> | <b>9.7</b>   | 15.7        | <b>0.74</b> |
|        | LGTNO | 5342   | 48.1       | 48.4       | 0.3        | 0.6        | <b>9.7</b>   | <b>15.6</b> | <b>0.74</b> |

**Table S4: Ground-level MDA8 ozone statistics over the model domain and geographic regions for July 2019. Bold numbers indicate better performance for each case. See Fig. 4 for the interpretation of geographical regions.**

| Region | Case  | Record | OBS [ppbv] | MOD [ppbv] | MB [ppbv]   | NMB [%]     | cRMSE [ppbv] | NME [%]     | R           |
|--------|-------|--------|------------|------------|-------------|-------------|--------------|-------------|-------------|
| Domain | CNTRL | 35158  | 44.6       | 45.6       | <b>1.0</b>  | <b>2.2</b>  | <b>8.3</b>   | <b>14.4</b> | <b>0.75</b> |
|        | LGTNO | 35158  | 44.6       | 46.1       | 1.4         | 3.2         | <b>8.3</b>   | 14.5        | <b>0.75</b> |
| NE     | CNTRL | 5462   | 45.6       | 48.4       | <b>2.8</b>  | <b>6.2</b>  | <b>7.7</b>   | <b>13.9</b> | <b>0.78</b> |
|        | LGTNO | 5462   | 45.6       | 48.8       | 3.2         | 7.1         | 7.8          | 14.3        | 0.77        |
| SE     | CNTRL | 5975   | 39.9       | 44.1       | <b>4.2</b>  | <b>10.4</b> | 6.9          | <b>15.9</b> | <b>0.77</b> |
|        | LGTNO | 5975   | 39.9       | 44.9       | 5.0         | 12.4        | <b>6.8</b>   | 16.8        | <b>0.77</b> |
| UM     | CNTRL | 8618   | 44.6       | 44.8       | <b>0.3</b>  | <b>0.6</b>  | <b>7.2</b>   | <b>12.7</b> | <b>0.72</b> |
|        | LGTNO | 8618   | 44.6       | 45.3       | 0.7         | 1.5         | <b>7.2</b>   | <b>12.7</b> | <b>0.72</b> |
| LM     | CNTRL | 3542   | 38.3       | 42.4       | <b>4.1</b>  | <b>10.6</b> | 7.1          | <b>17.3</b> | 0.82        |
|        | LGTNO | 3542   | 38.3       | 42.8       | 4.5         | 11.6        | <b>7.0</b>   | 17.6        | <b>0.83</b> |
| RM     | CNTRL | 6009   | 50.2       | 48.6       | -1.6        | -3.2        | 7.9          | 12.2        | 0.55        |
|        | LGTNO | 6009   | 50.2       | 49.1       | <b>-1.1</b> | <b>-2.2</b> | <b>7.7</b>   | <b>11.8</b> | <b>0.57</b> |
| PC     | CNTRL | 5552   | 46.8       | 44.7       | -2.2        | -4.7        | <b>10.3</b>  | <b>17.0</b> | <b>0.80</b> |
|        | LGTNO | 5552   | 46.8       | 44.7       | <b>-2.1</b> | <b>-4.6</b> | <b>10.3</b>  | <b>17.0</b> | <b>0.80</b> |

**Table S5: Ground-level MDA8 ozone statistics over the model domain and geographic regions for September 2019. Bold numbers indicate better performance for each case. See Fig. 4 for the interpretation of geographical regions.**

| Region | Case  | Record | OBS [ppbv] | MOD [ppbv] | MB [ppbv]  | NMB [%]    | cRMSE [ppbv] | NME [%]     | R           |
|--------|-------|--------|------------|------------|------------|------------|--------------|-------------|-------------|
| Domain | CNTRL | 33844  | 42.8       | 44.3       | <b>1.6</b> | <b>3.6</b> | 7.4          | 13.7        | 0.77        |
|        | LGTNO | 33844  | 42.8       | 44.6       | 1.8        | 4.2        | <b>7.3</b>   | <b>13.6</b> | <b>0.78</b> |
| NE     | CNTRL | 5263   | 39.6       | 42.9       | <b>3.3</b> | <b>8.3</b> | <b>6.8</b>   | <b>15.4</b> | 0.79        |
|        | LGTNO | 5263   | 39.6       | 42.9       | 3.4        | 8.5        | <b>6.8</b>   | 15.5        | <b>0.80</b> |
| SE     | CNTRL | 5706   | 45.1       | 46.0       | <b>0.9</b> | <b>2.1</b> | 6.6          | <b>11.3</b> | 0.75        |
|        | LGTNO | 5706   | 45.1       | 46.3       | 1.2        | 2.6        | <b>6.5</b>   | <b>11.3</b> | <b>0.76</b> |
| UM     | CNTRL | 8488   | 40.0       | 41.1       | <b>1.1</b> | <b>2.8</b> | <b>6.3</b>   | <b>12.7</b> | <b>0.81</b> |
|        | LGTNO | 8488   | 40.0       | 41.3       | 1.3        | 3.2        | <b>6.3</b>   | <b>12.7</b> | <b>0.81</b> |
| LM     | CNTRL | 3341   | 42.9       | 44.0       | <b>1.1</b> | <b>2.6</b> | 7.4          | 14.0        | 0.74        |
|        | LGTNO | 3341   | 42.9       | 44.5       | 1.5        | 3.6        | <b>7.3</b>   | <b>13.9</b> | <b>0.75</b> |
| RM     | CNTRL | 5835   | 45.6       | 47.4       | <b>1.8</b> | <b>3.9</b> | 7.5          | 13.3        | 0.70        |
|        | LGTNO | 5835   | 45.6       | 47.8       | 2.2        | 4.9        | <b>7.2</b>   | <b>13.0</b> | <b>0.72</b> |
| PC     | CNTRL | 5211   | 44.6       | 45.8       | <b>1.2</b> | <b>2.8</b> | 9.5          | 16.7        | <b>0.77</b> |
|        | LGTNO | 5211   | 44.6       | 45.9       | 1.4        | 3.0        | <b>9.4</b>   | <b>16.6</b> | <b>0.77</b> |

**Table S6: Ground-level daily mean NO<sub>x</sub> statistics over the model domain and geographic regions for June 2019. Bold numbers indicate better performance for each case. See Fig. 4 for the interpretation of geographical regions.**

| Region | Case  | Record | OBS [ppbv] | MOD [ppbv] | MB [ppbv]    | NMB [%]       | cRMSE [ppbv] | NME [%]      | R           |
|--------|-------|--------|------------|------------|--------------|---------------|--------------|--------------|-------------|
| Domain | CNTRL | 10650  | 7.94       | 6.75       | <b>-1.19</b> | <b>-14.90</b> | <b>7.55</b>  | <b>55.30</b> | <b>0.54</b> |
|        | LGTNO | 10650  | 7.94       | 6.75       | <b>-1.19</b> | <b>-14.90</b> | <b>7.55</b>  | <b>55.30</b> | <b>0.54</b> |
| NE     | CNTRL | 1580   | 10.18      | 8.27       | <b>-1.92</b> | <b>-18.80</b> | <b>9.07</b>  | <b>55.50</b> | <b>0.50</b> |
|        | LGTNO | 1580   | 10.18      | 8.27       | <b>-1.92</b> | <b>-18.80</b> | <b>9.07</b>  | <b>55.50</b> | <b>0.50</b> |
| SE     | CNTRL | 1081   | 10.06      | 6.93       | <b>-3.12</b> | <b>-31.10</b> | <b>7.96</b>  | <b>51.30</b> | <b>0.57</b> |
|        | LGTNO | 1081   | 10.06      | 6.93       | -3.13        | <b>-31.10</b> | <b>7.96</b>  | <b>51.30</b> | <b>0.57</b> |
| UM     | CNTRL | 1173   | 10.12      | 7.45       | <b>-2.67</b> | <b>-26.40</b> | <b>7.29</b>  | <b>46.20</b> | <b>0.56</b> |
|        | LGTNO | 1173   | 10.12      | 7.45       | <b>-2.67</b> | <b>-26.40</b> | <b>7.29</b>  | <b>46.20</b> | <b>0.56</b> |
| LM     | CNTRL | 1618   | 6.93       | 7.01       | <b>0.08</b>  | 1.11          | <b>6.92</b>  | <b>58.70</b> | <b>0.46</b> |
|        | LGTNO | 1618   | 6.93       | 7.01       | <b>0.08</b>  | <b>1.10</b>   | <b>6.92</b>  | <b>58.70</b> | <b>0.46</b> |
| RM     | CNTRL | 2552   | 4.30       | 4.03       | <b>-0.27</b> | -6.32         | <b>4.24</b>  | <b>53.40</b> | <b>0.74</b> |
|        | LGTNO | 2552   | 4.30       | 4.03       | <b>-0.27</b> | <b>-6.28</b>  | <b>4.24</b>  | <b>53.40</b> | <b>0.74</b> |
| PC     | CNTRL | 2646   | 8.89       | 7.94       | <b>-0.95</b> | <b>-10.70</b> | <b>8.92</b>  | <b>60.80</b> | <b>0.41</b> |
|        | LGTNO | 2646   | 8.89       | 7.94       | <b>-0.95</b> | <b>-10.70</b> | <b>8.92</b>  | <b>60.80</b> | <b>0.41</b> |

25 Table S7: Ground-level daily mean NO<sub>x</sub> statistics over the model domain and geographic regions for July 2019. Bold numbers indicate better performance for each case. See Fig. 4 for the interpretation of geographical regions.

| Region | Case  | Record | OBS [ppbv] | MOD [ppbv] | MB [ppbv]    | NMB [%]       | cRMSE [ppbv] | NME [%]      | R           |
|--------|-------|--------|------------|------------|--------------|---------------|--------------|--------------|-------------|
| Domain | CNTRL | 10790  | 7.87       | 7.15       | <b>-0.72</b> | <b>-9.16</b>  | <b>7.65</b>  | <b>56.20</b> | <b>0.54</b> |
|        | LGTNO | 10790  | 7.87       | 7.15       | <b>-0.72</b> | -9.18         | <b>7.65</b>  | <b>56.20</b> | <b>0.54</b> |
| NE     | CNTRL | 1540   | 10.04      | 9.35       | <b>-0.70</b> | <b>-6.94</b>  | <b>8.88</b>  | <b>57.60</b> | <b>0.50</b> |
|        | LGTNO | 1540   | 10.04      | 9.34       | <b>-0.70</b> | -6.98         | <b>8.88</b>  | <b>57.60</b> | <b>0.50</b> |
| SE     | CNTRL | 1067   | 10.22      | 7.74       | <b>-2.47</b> | <b>-24.20</b> | <b>7.83</b>  | <b>50.50</b> | <b>0.54</b> |
|        | LGTNO | 1067   | 10.22      | 7.74       | -2.48        | <b>-24.20</b> | <b>7.83</b>  | <b>50.50</b> | <b>0.54</b> |
| UM     | CNTRL | 1191   | 9.53       | 7.25       | <b>-2.28</b> | <b>-24.00</b> | <b>7.04</b>  | <b>45.70</b> | <b>0.56</b> |
|        | LGTNO | 1191   | 9.53       | 7.25       | -2.29        | <b>-24.00</b> | <b>7.04</b>  | <b>45.70</b> | <b>0.56</b> |
| LM     | CNTRL | 1636   | 6.04       | 7.04       | <b>1.00</b>  | 16.60         | 6.75         | 66.30        | <b>0.43</b> |
|        | LGTNO | 1636   | 6.04       | 7.03       | <b>1.00</b>  | <b>16.50</b>  | <b>6.74</b>  | <b>66.20</b> | <b>0.43</b> |
| RM     | CNTRL | 2601   | 4.24       | 3.88       | -0.36        | -8.41         | 3.88         | <b>51.20</b> | <b>0.77</b> |
|        | LGTNO | 2601   | 4.24       | 3.88       | <b>-0.35</b> | <b>-8.36</b>  | <b>3.87</b>  | <b>51.20</b> | <b>0.77</b> |
| PC     | CNTRL | 2755   | 9.54       | 8.79       | <b>-0.75</b> | <b>-7.83</b>  | <b>9.72</b>  | <b>60.60</b> | <b>0.45</b> |
|        | LGTNO | 2755   | 9.54       | 8.79       | <b>-0.75</b> | <b>-7.83</b>  | <b>9.72</b>  | <b>60.60</b> | <b>0.45</b> |



**Table S8: Ground-level daily mean NO<sub>x</sub> statistics over the model domain and geographic regions for September 2019. Bold numbers indicate better performance for each case. See Fig. 4 for the interpretation of geographical regions.**

| Region | Case  | Record | OBS [ppbv] | MOD [ppbv] | MB [ppbv]    | NMB [%]       | cRMSE [ppbv] | NME [%]      | R           |
|--------|-------|--------|------------|------------|--------------|---------------|--------------|--------------|-------------|
| Domain | CNTRL | 10545  | 9.21       | 7.99       | <b>-1.22</b> | <b>-13.20</b> | <b>8.53</b>  | <b>53.60</b> | <b>0.57</b> |
|        | LGTNO | 10545  | 9.21       | 7.99       | <b>-1.22</b> | <b>-13.20</b> | <b>8.53</b>  | <b>53.60</b> | <b>0.57</b> |
| NE     | CNTRL | 1552   | 11.14      | 10.20      | <b>-0.94</b> | <b>-8.43</b>  | <b>9.69</b>  | <b>56.20</b> | <b>0.51</b> |
|        | LGTNO | 1552   | 11.14      | 10.20      | <b>-0.94</b> | -8.44         | <b>9.69</b>  | <b>56.20</b> | <b>0.51</b> |
| SE     | CNTRL | 999    | 11.55      | 7.93       | <b>-3.62</b> | <b>-31.40</b> | <b>9.15</b>  | <b>52.20</b> | <b>0.60</b> |
|        | LGTNO | 999    | 11.55      | 7.93       | <b>-3.62</b> | <b>-31.40</b> | <b>9.15</b>  | <b>52.20</b> | <b>0.60</b> |
| UM     | CNTRL | 1153   | 11.04      | 8.86       | <b>-2.18</b> | <b>-19.80</b> | <b>8.31</b>  | <b>45.50</b> | <b>0.57</b> |
|        | LGTNO | 1153   | 11.04      | 8.85       | <b>-2.18</b> | <b>-19.80</b> | <b>8.31</b>  | <b>45.50</b> | <b>0.57</b> |
| LM     | CNTRL | 1709   | 7.27       | 8.76       | <b>1.49</b>  | <b>20.50</b>  | <b>7.18</b>  | <b>62.40</b> | <b>0.51</b> |
|        | LGTNO | 1709   | 7.27       | 8.75       | <b>1.49</b>  | <b>20.50</b>  | <b>7.18</b>  | <b>62.40</b> | <b>0.51</b> |
| RM     | CNTRL | 2563   | 5.15       | 4.39       | <b>-0.77</b> | <b>-14.90</b> | <b>5.83</b>  | <b>51.70</b> | <b>0.72</b> |
|        | LGTNO | 2563   | 5.15       | 4.39       | <b>-0.77</b> | <b>-14.90</b> | <b>5.83</b>  | <b>51.70</b> | <b>0.72</b> |
| PC     | CNTRL | 2569   | 11.63      | 9.37       | <b>-2.26</b> | <b>-19.40</b> | <b>10.00</b> | <b>53.30</b> | <b>0.52</b> |
|        | LGTNO | 2569   | 11.63      | 9.37       | <b>-2.26</b> | -19.50        | <b>10.00</b> | <b>53.30</b> | <b>0.52</b> |

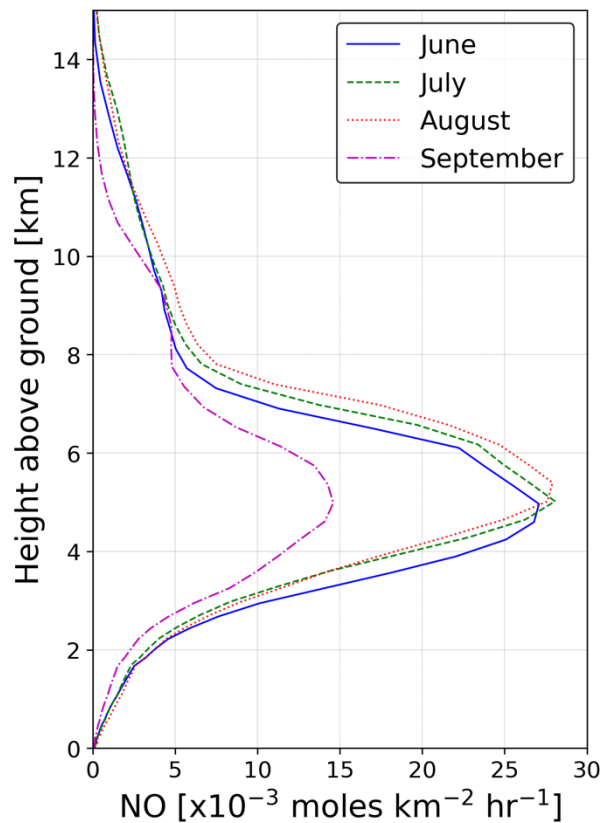

35 **Figure S1: Vertical distribution of monthly mean LNO emission profiles produced by the LNO emission model for June through September 2019 across the entire CONUS model domain.**

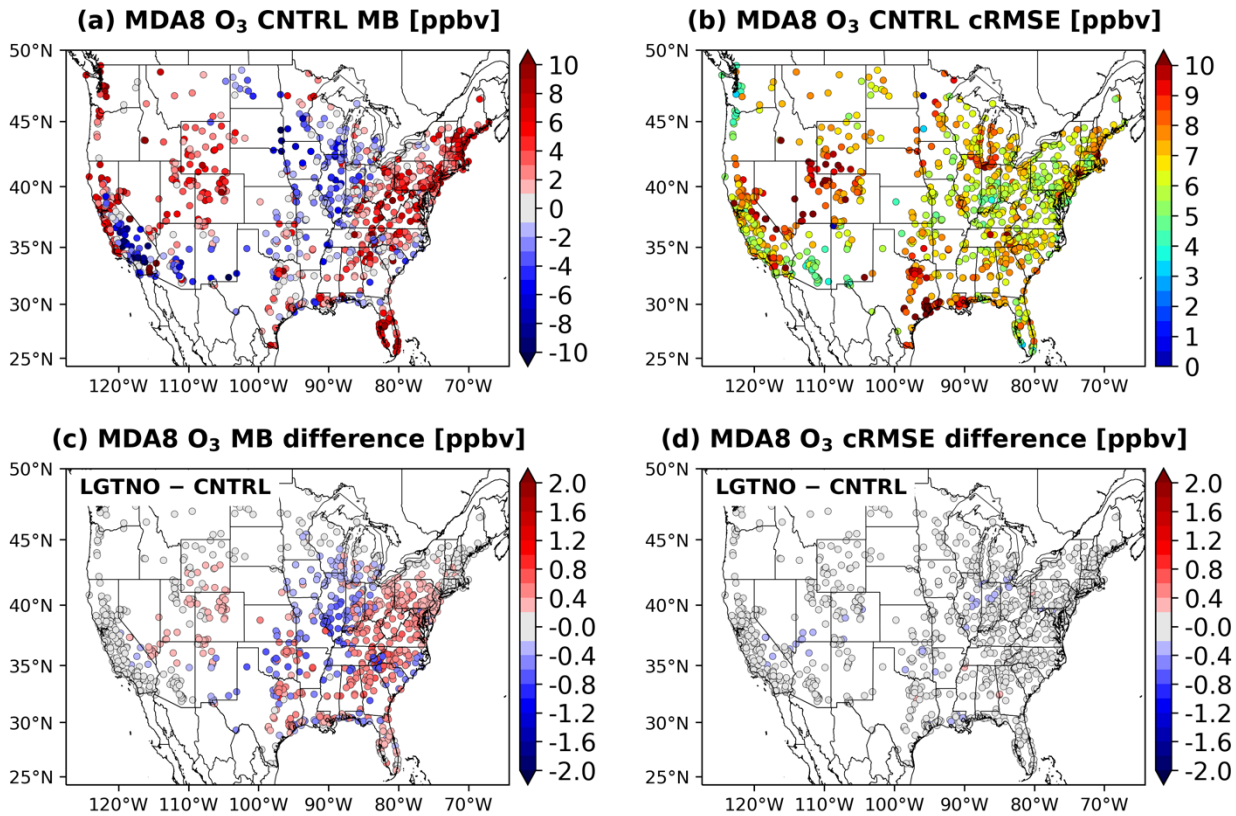

40 **Figure S2: Spatial distribution of ground-level MDA8 ozone statistics for June 2019. (a) Mean bias of the CNTRL; (b) centered RMSE of the CNTRL; (c) absolute mean bias difference between the LGTNO and the CNTRL; (d) centered RMSE difference between the LGTNO and the CNTRL. In (c) and (d), negative and positive values represent improved and degraded statistics when including lightning NO emission, respectively.**

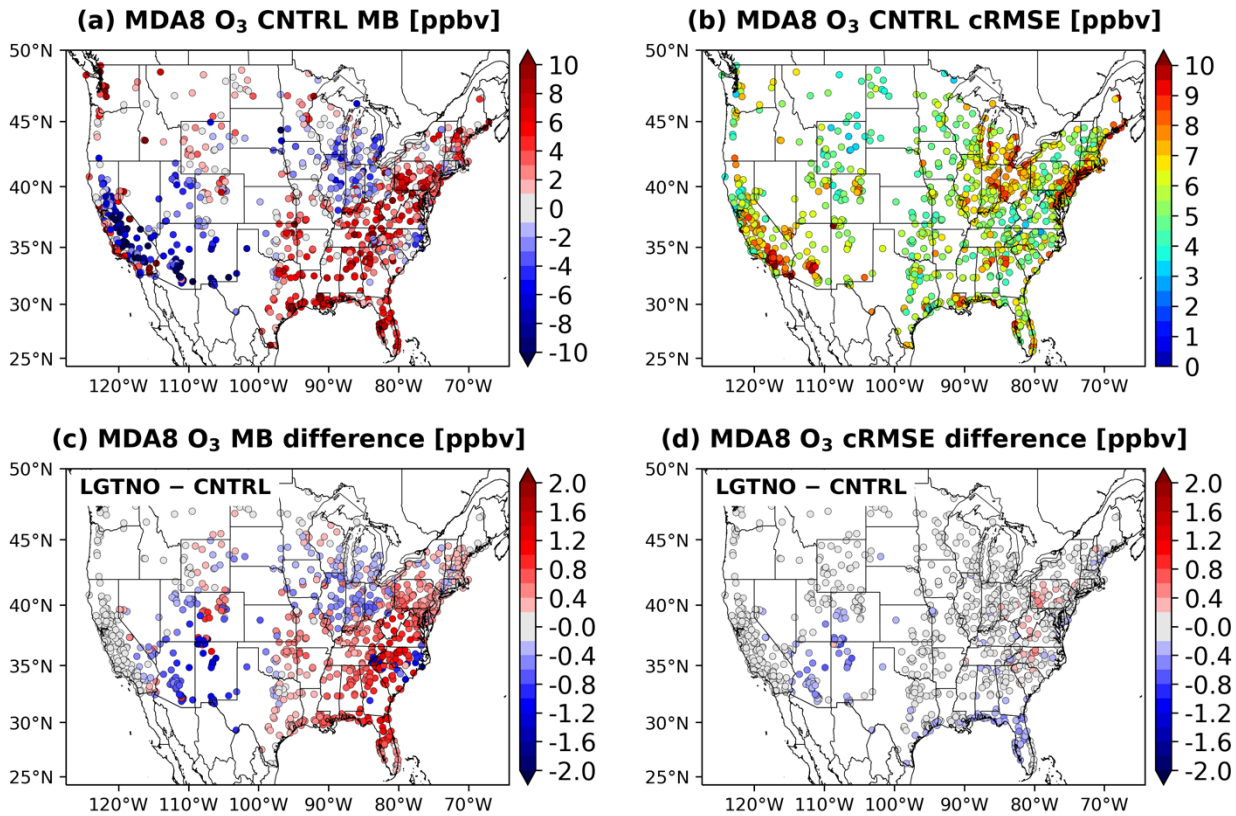

45

Figure S3: Spatial distribution of ground-level MDA8 ozone statistics for July 2019. (a) Mean bias of the CNTRL; (b) centered RMSE of the CNTRL; (c) absolute mean bias difference between the LGTNO and the CNTRL; (d) centered RMSE difference between the LGTNO and the CNTRL. In (c) and (d), negative and positive values represent improved and degraded statistics when including lightning NO emission, respectively.

50

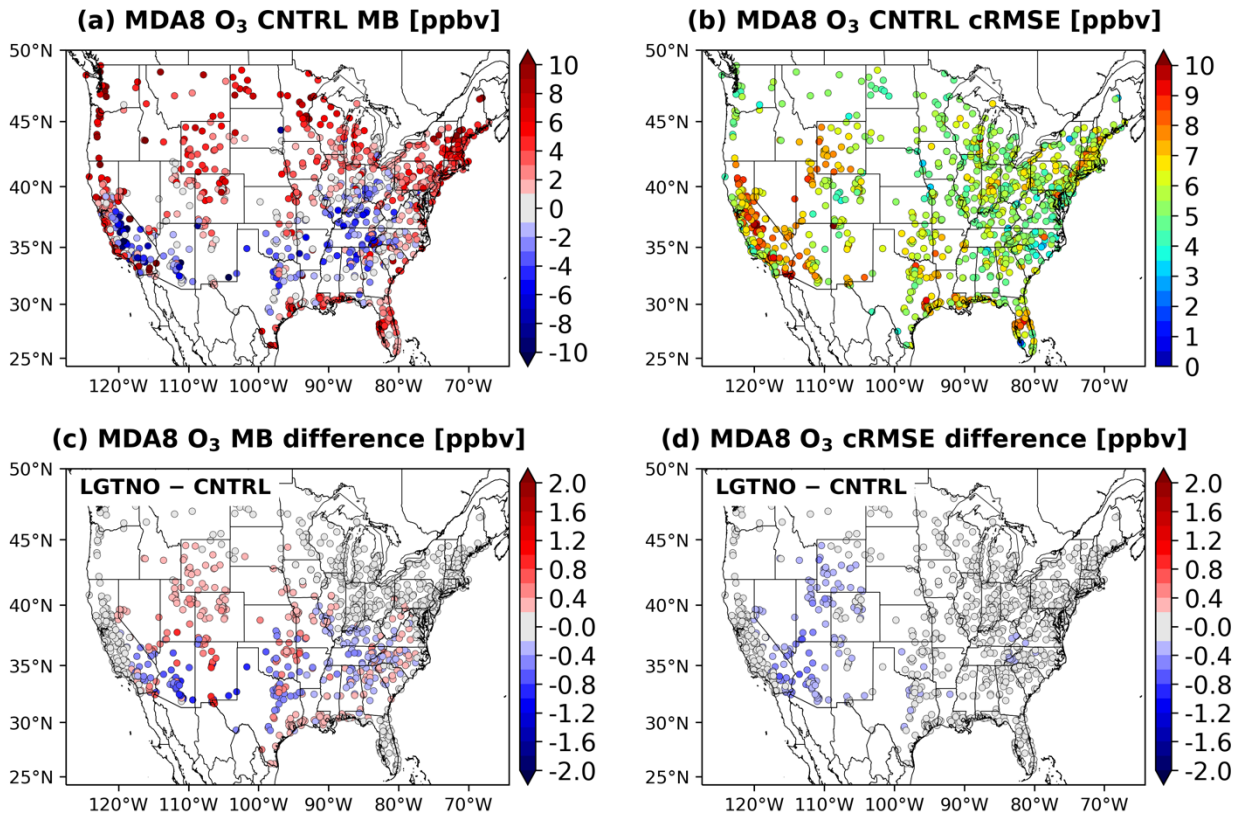

Figure S4: Spatial distribution of ground-level MDA8 ozone statistics for September 2019. (a) Mean bias of the CNTRL; (b) centered RMSE of the CNTRL; (c) absolute mean bias difference between the LGTNO and the CNTRL; (d) centered RMSE difference between the LGTNO and the CNTRL. In (c) and (d), negative and positive values represent improved and degraded statistics when including lightning NO emission, respectively.

55

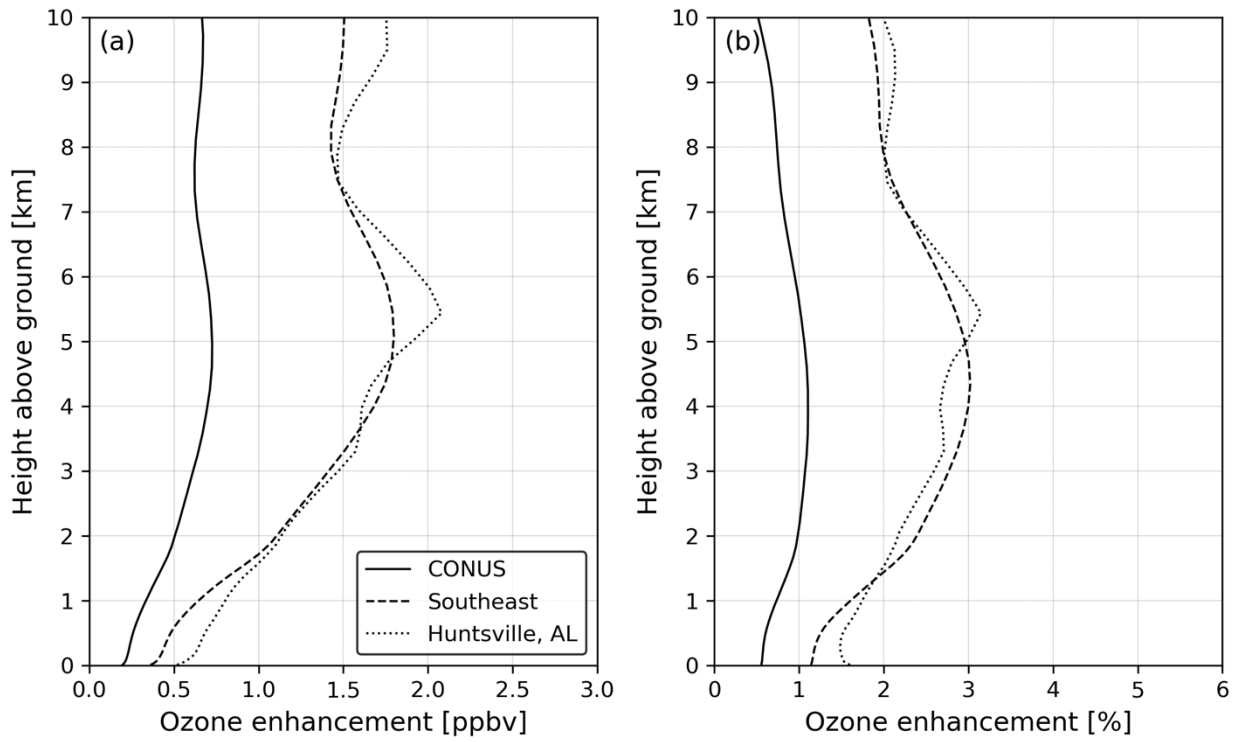

60 **Figure S5: Vertical distribution of average ozone enhancement due to lightning NO emission during June 2019 for the CONUS, the southeast U.S. (arbitrarily selected 25–40°N, 75–95°W for computation), and Huntsville, AL. (a) Ozone enhancement in ppbv; (b) ozone enhancement in percent.**

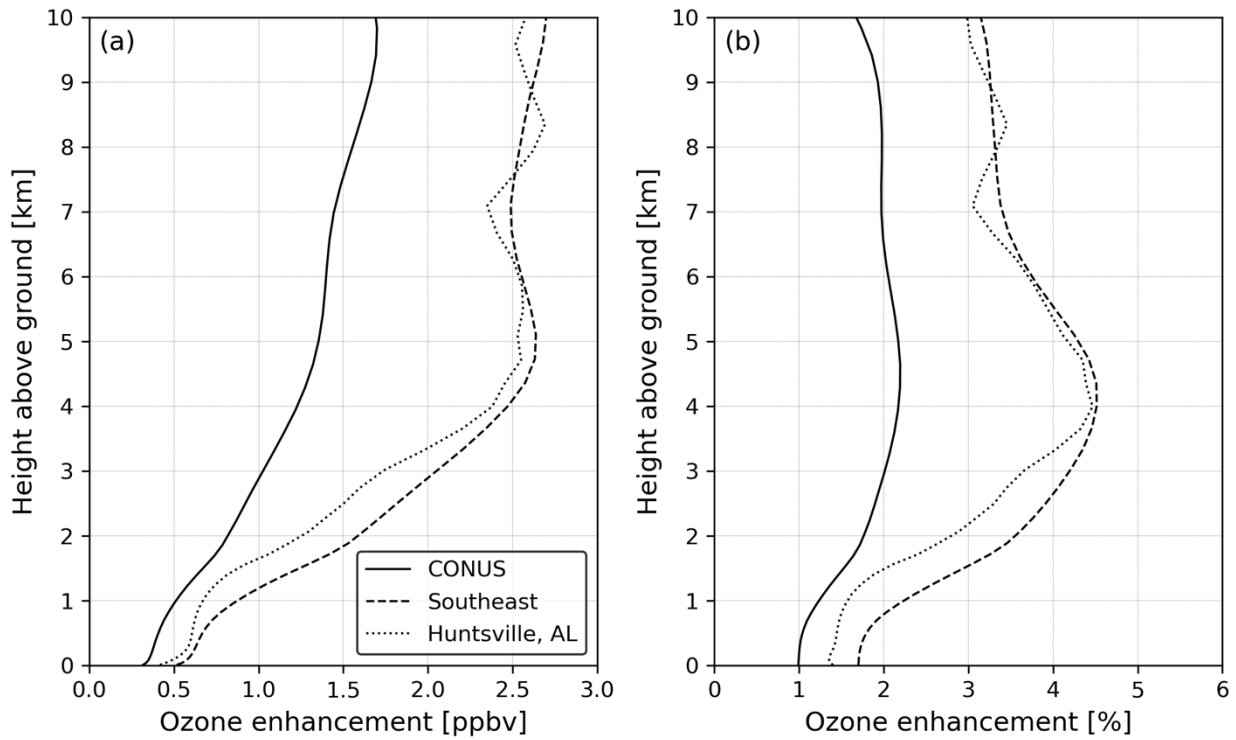

65 **Figure S6: Vertical distribution of average ozone enhancement due to lightning NO emission during July 2019 for the CONUS, the southeast U.S. (arbitrarily selected 25–40°N, 75–95°W for computation), and Huntsville, AL. (a) Ozone enhancement in ppbv; (b) ozone enhancement in percent.**

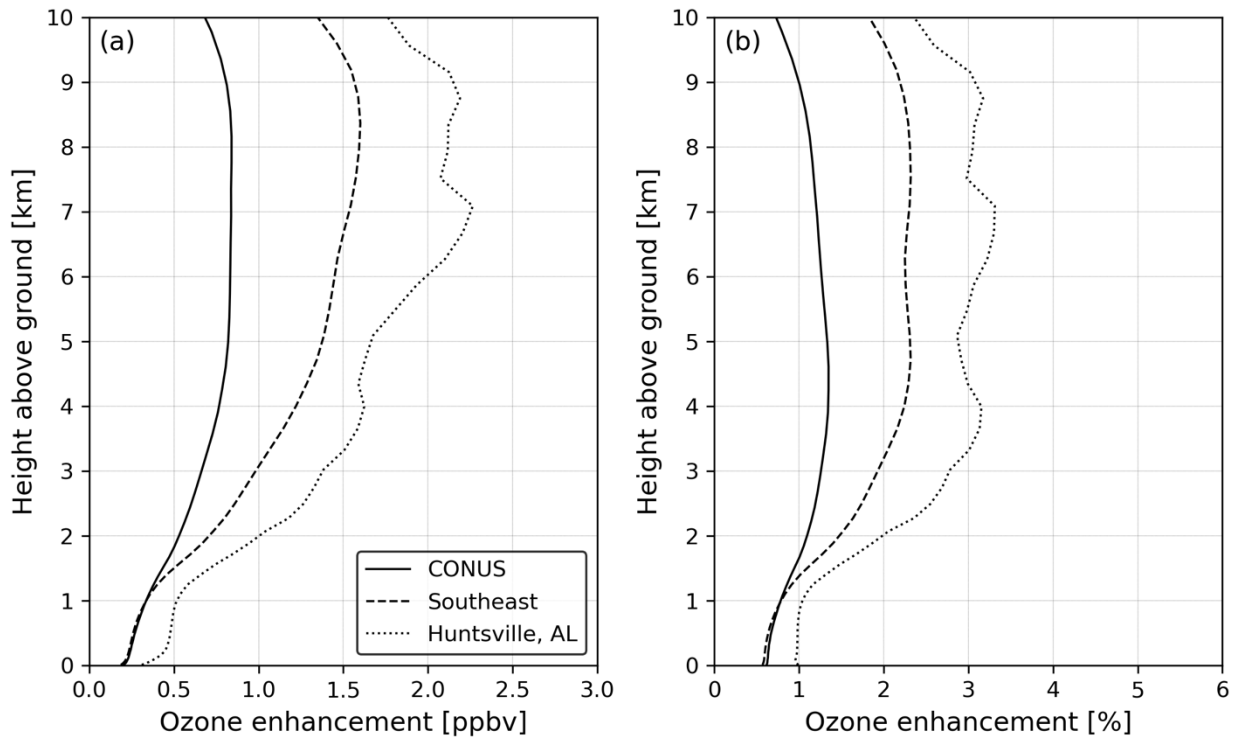

70

**Figure S7: Vertical distribution of average ozone enhancement due to lightning NO emission during September 2019 for the CONUS, the southeast U.S. (arbitrarily selected 25–40°N, 75–95°W for computation), and Huntsville, AL. (a) Ozone enhancement in ppbv; (b) ozone enhancement in percent.**

75



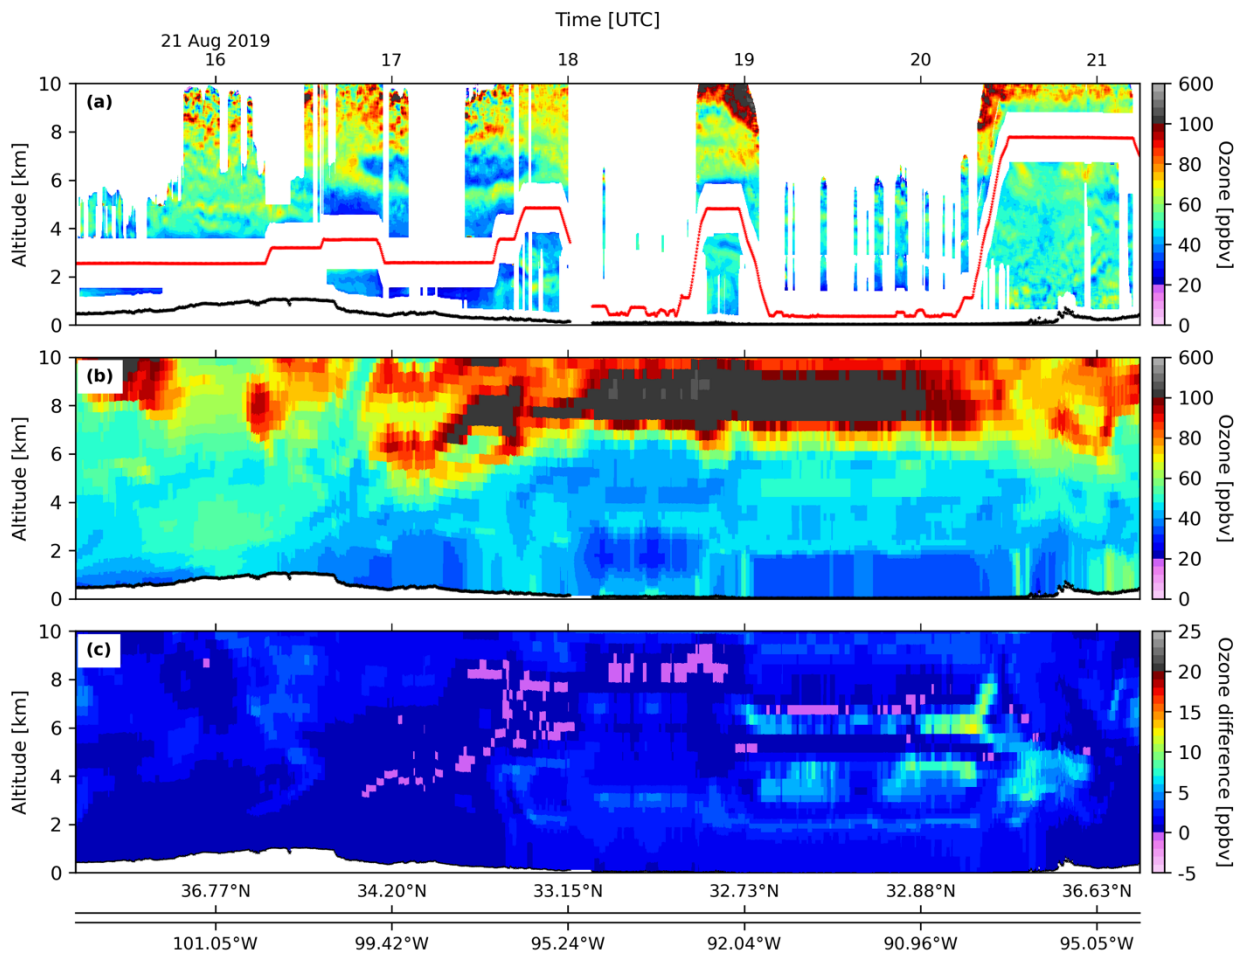

**Figure S8:** Time-height cross sections of lidar-measured and model-simulated ozone mixing ratio along the FIREX-AQ flight track on 21 August 2019. (a) Lidar-measured ozone profiles; (b) simulated ozone mixing ratio by the CNTRL model run; (c) ozone difference between the LGTNO and the CNTRL.

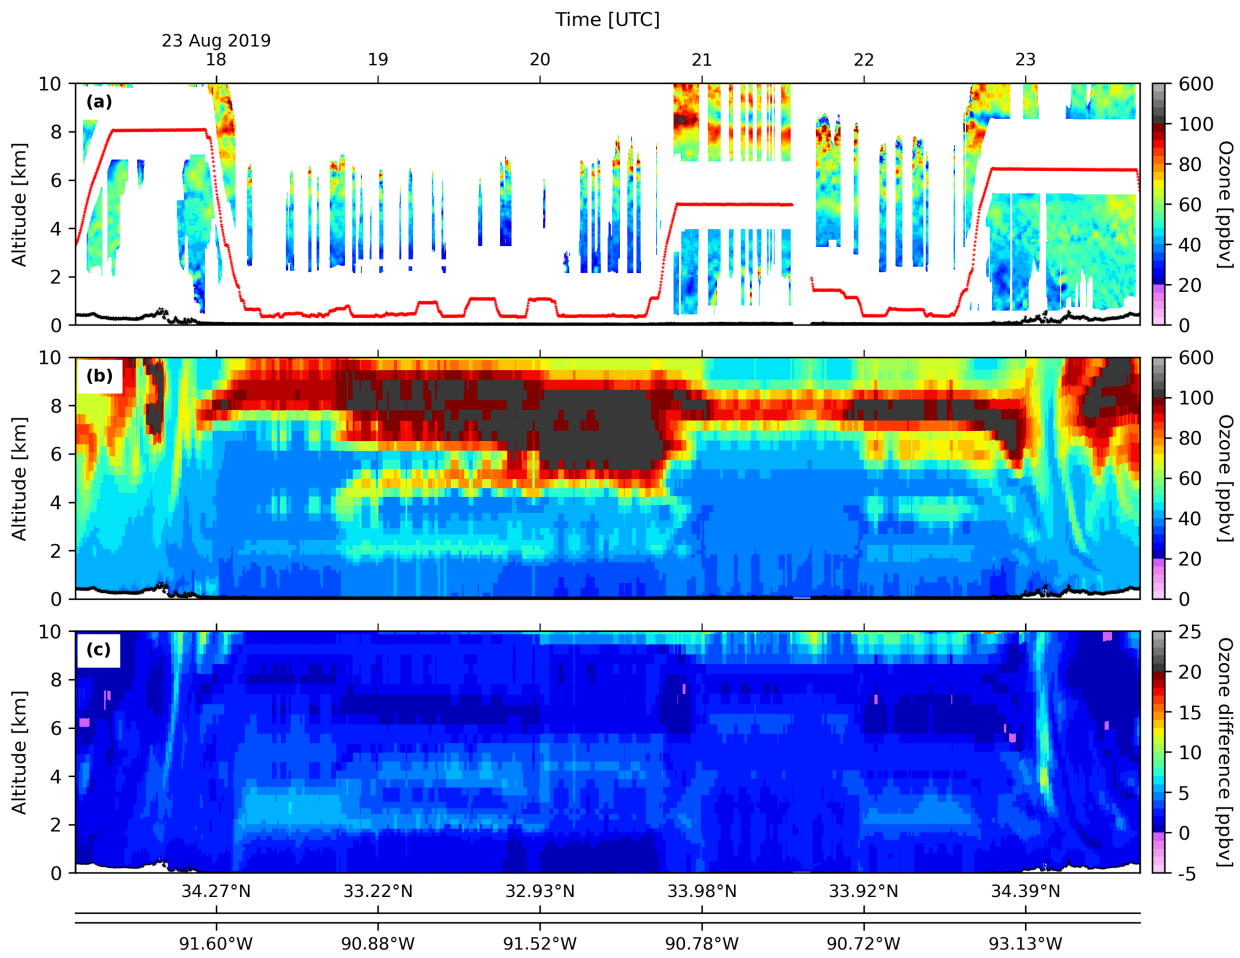

85 **Figure S9:** Time-height cross sections of lidar-measured and model-simulated ozone mixing ratio along the FIREX-AQ flight track on 23 August 2019. (a) Lidar-measured ozone profiles; (b) simulated ozone mixing ratio by the CNTRL model run; (c) ozone difference between the LGTNO and the CNTRL.

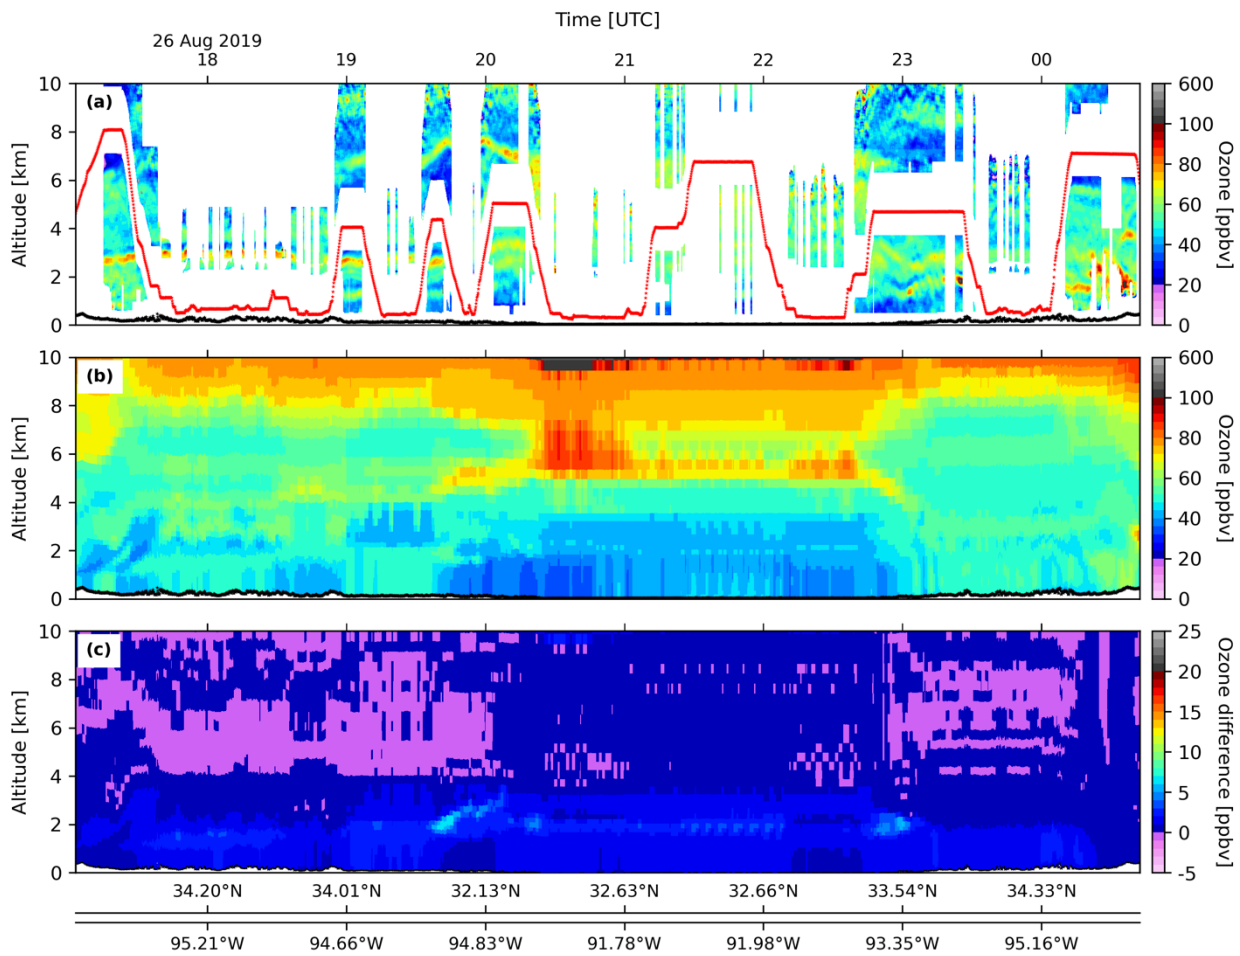

90 **Figure S10: Time-height cross sections of lidar-measured and model-simulated ozone mixing ratio along the FIREX-AQ flight track on 26 August 2019. (a) Lidar-measured ozone profiles; (b) simulated ozone mixing ratio by the CNTRL model run; (c) ozone difference between the LGTNO and the CNTRL.**
